# Supplementary material for: Long noncoding RNA Cfast regulates cardiac fibrosis
Source: PubMed Central journal article supplement — Mol Ther Nucleic Acids. 2020 Nov 26;23:377–92. doi: 10.1016/j.omtn.2020.11.013 (PMC7787992; doi:10.1016/j.omtn.2020.11.013), 2020-11-26
Supplement: mmc1.pdf [file mmc1.pdf]

OMTN, Volume 23

## Supplemental Information

### Long noncoding RNA *Cfast*

### regulates cardiac fibrosis

Feng Zhang, Xuyang Fu, Masaharu Kataoka, Ning Liu, Yingchao Wang, Feng Gao, Tian Liang, Xiaoxuan Dong, Jianqiu Pei, Xiaoyun Hu, Wei Zhu, Hong Yu, Douglas B. Cowan, Xinyang Hu, Zhan-Peng Huang, Jian'an Wang, Da-Zhi Wang, and Jinghai Chen

# Supplemental Figure 1.

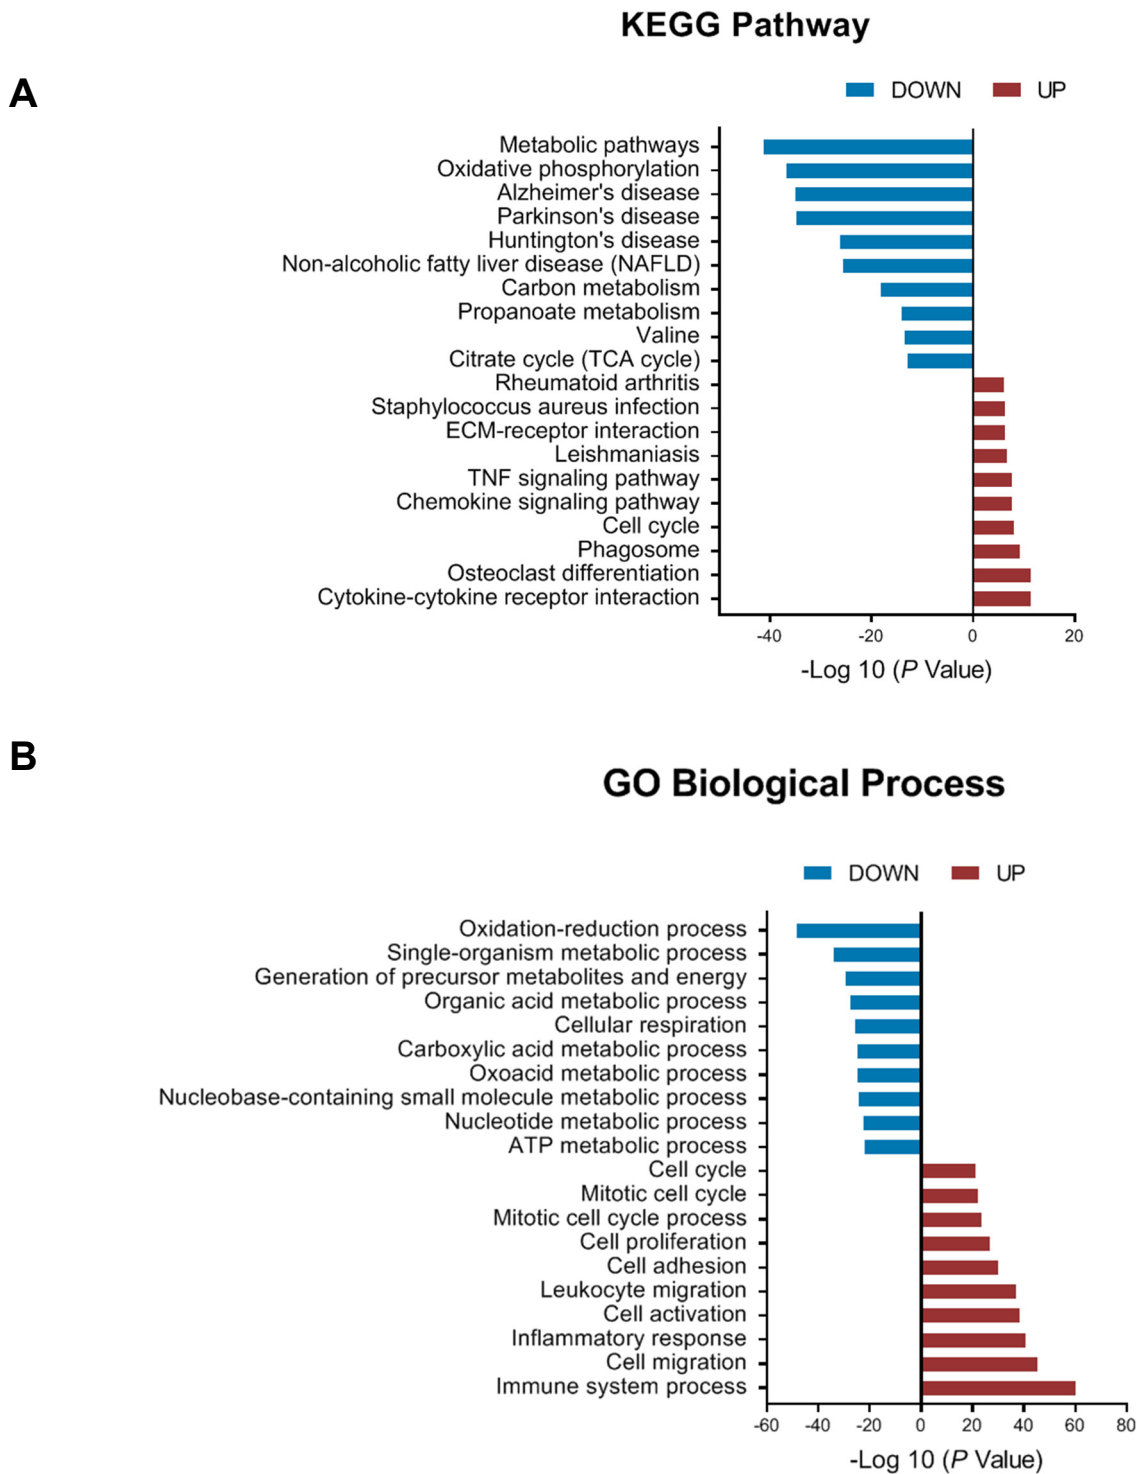

**Supplemental Figure 1. Analysis of microarray data after 3days myocardial infarction (MI).** (A and B) KEGG pathway (A) and GO terms linked to biological process(B) for the up-regulated and down-regulated genes after myocardial infarction.

## Supplemental Figure 2.

A

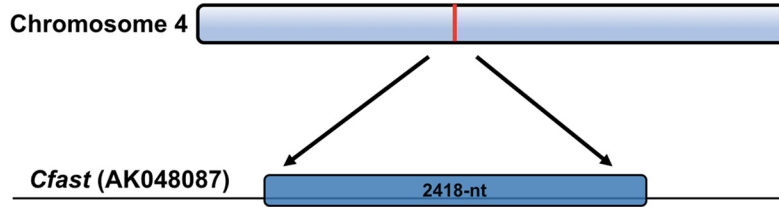

B

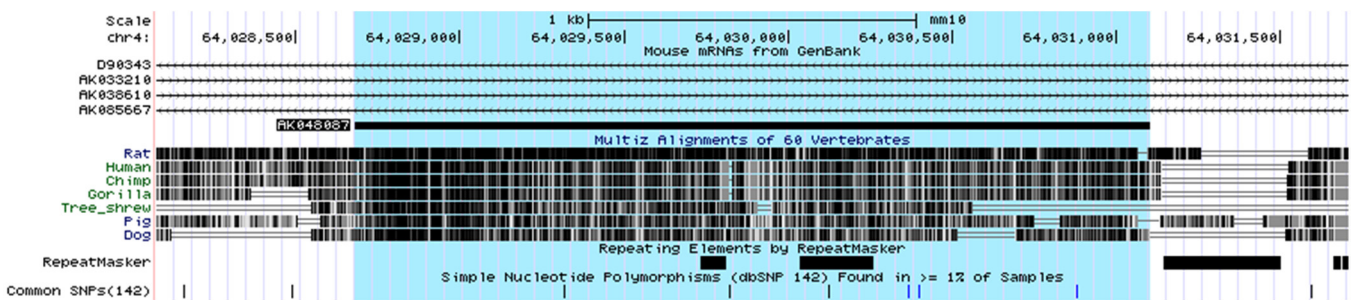

C

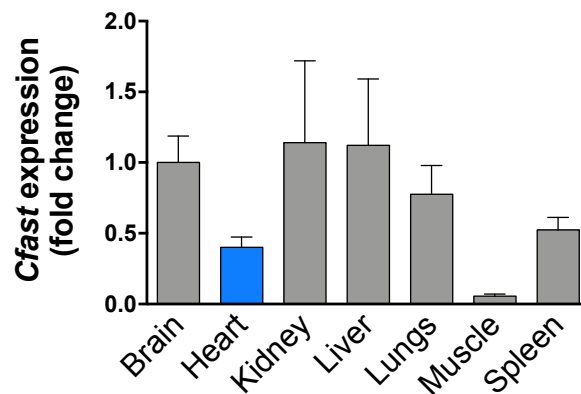

### Supplemental Figure 2. Structure of lncRNA *Cfast* and its expression in different tissues.

(A) The lncRNA *Cfast* is located on chromosome 4 and appears to a single exon transcript.

(B) Conservation of *Cfast* in the mouse, Rat, Human, Chimp, Gorilla, Pig, Dog. The horizontal lines indicate the mouse *Cfast*. The black boxes show the conserved sequences of *Cfast* in Rat, Human, Chimp, Gorilla, Pig, Dog.

(C) Expression of *Cfast* in different tissues from adult mice. Data represent mean  $\pm$  SEM (n = 3).

# Supplemental Figure 3.

A

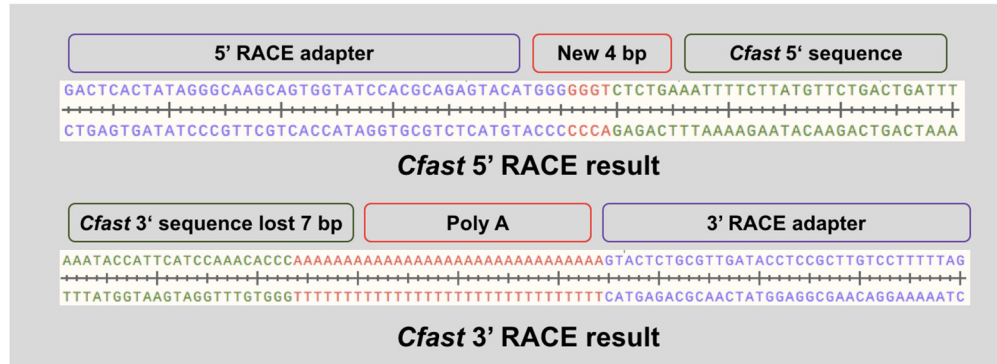

B

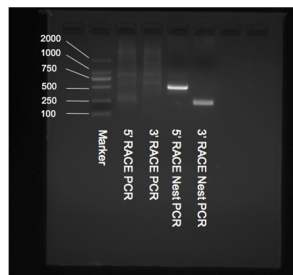

C

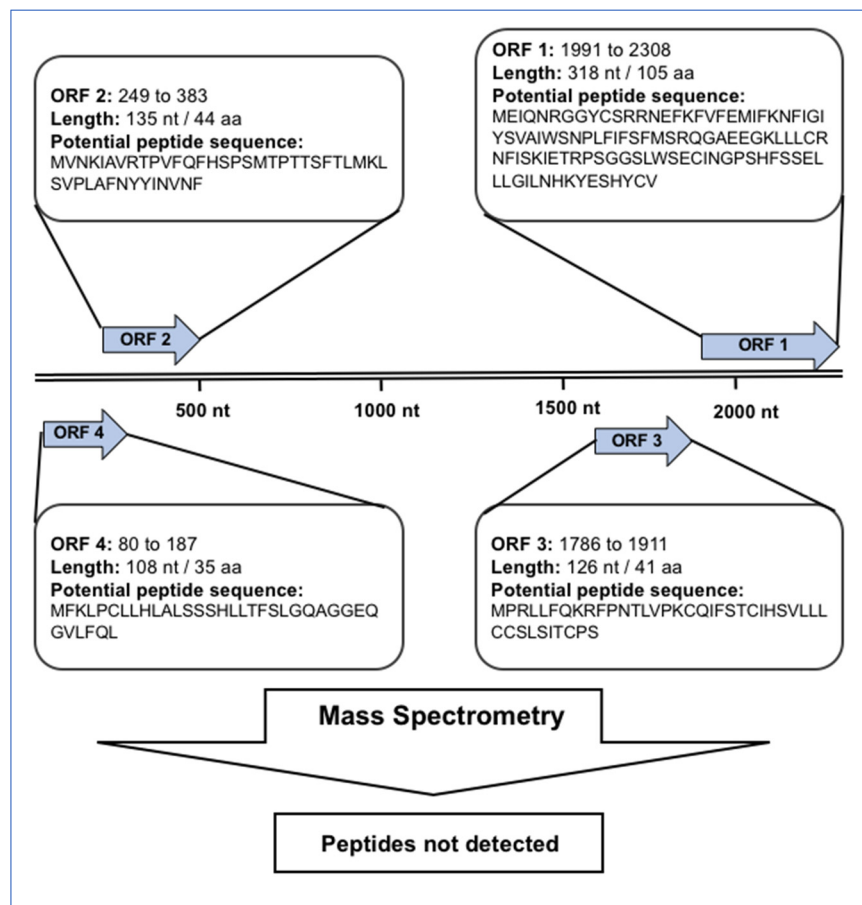

**Supplemental Figure 3. Cfast is a long non-coding RNA.**

(A) Graphical representation of 3' and 5' rapid amplification of cDNA (complementary DNA) ends (RACE) results of Cfast.

(B) PCR product Gel image of 3' and 5' RACE of Cfast

(C) Presentation of the open reading frames (ORFs) potentially encoded by the Cfast sequence.

## Supplemental Figure 4.

A

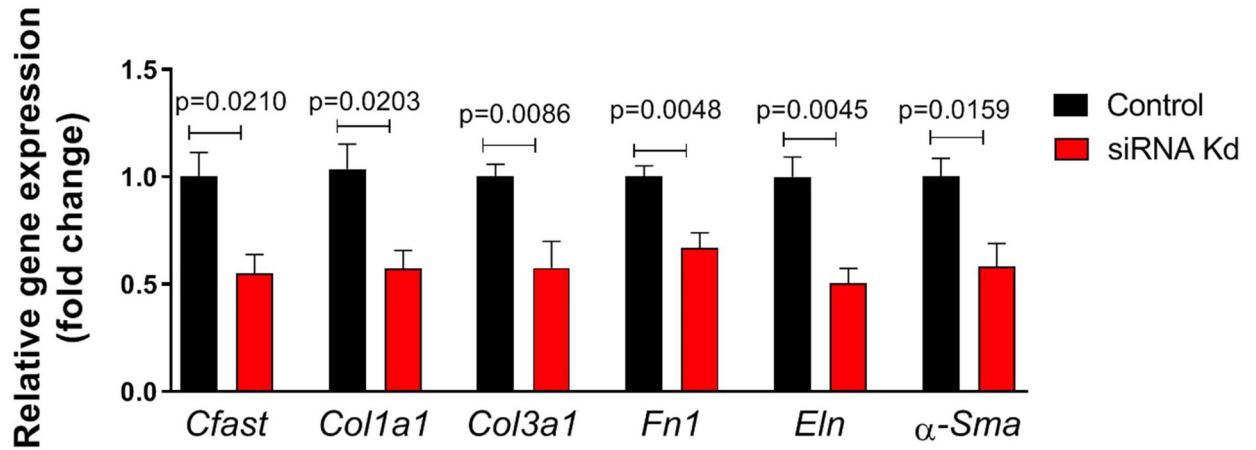

**Supplemental Figure 4 Knock-down of *Cfast* by siRNA inhibits expression of cardiac fibrotic genes.**

(A) qRT-PCR of *Cfast* and fibrosis genes in control and *Cfast* siRNA treated cardiac fibroblasts.  $n \geq 4$ , P values were determined by Student's t test..

## Supplemental Figure 5.

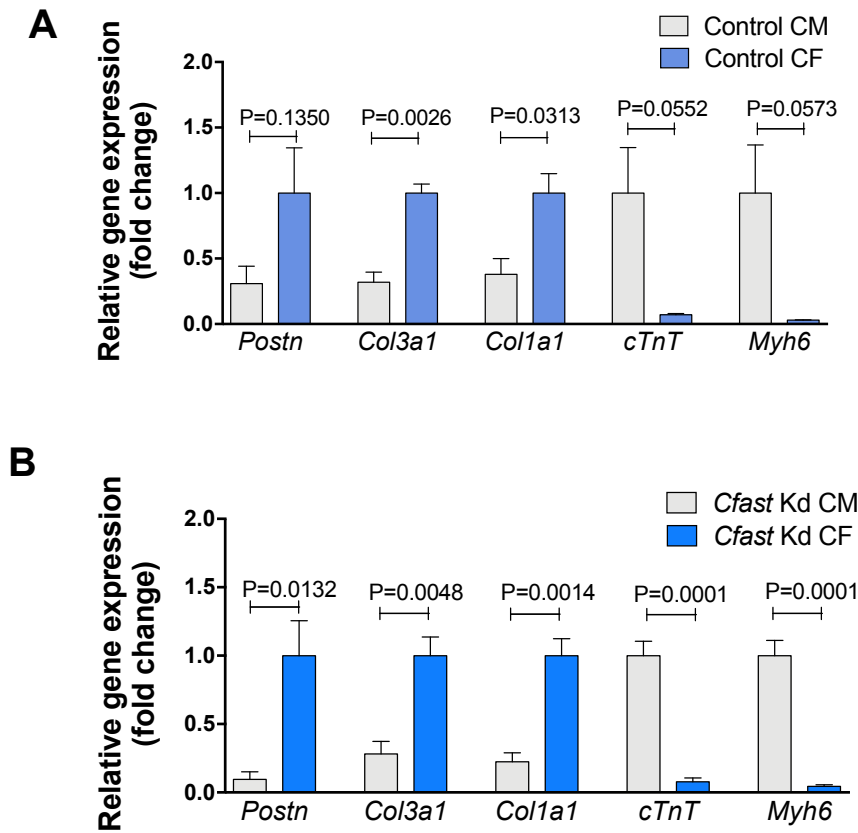

### Supplemental Figure 5 Expression of cardiomyocyte and cardiac fibroblast gene expression in mouse hearts after *Cfast* knockdown.

8 weeks old adult mice were subjected to myocardial infarction surgery. Immediately after MI surgery, control (Control) or *Cfast* knocking down lentivirus (*Cfast* Kd) was injected into myocardium adjacent to the infarcted area. Seven days later, cardiomyocytes (CM) and cardiac fibroblasts (CF) were isolated from the hearts of Control (A) or *Cfast* kd (B) mice. Expression of cardiomyocyte (*cTnT*, *Myh6*) or cardiac fibroblast (*Postn*, *Col3a1*, *Col1a1*) marker genes was determined by qRT-PCR. Data was represented as (CM/CF) ratio over mean fold change  $\pm$  SEM ( $n \geq 3$ ). P value was determined by Student's t test.

## Supplemental Figure 6.

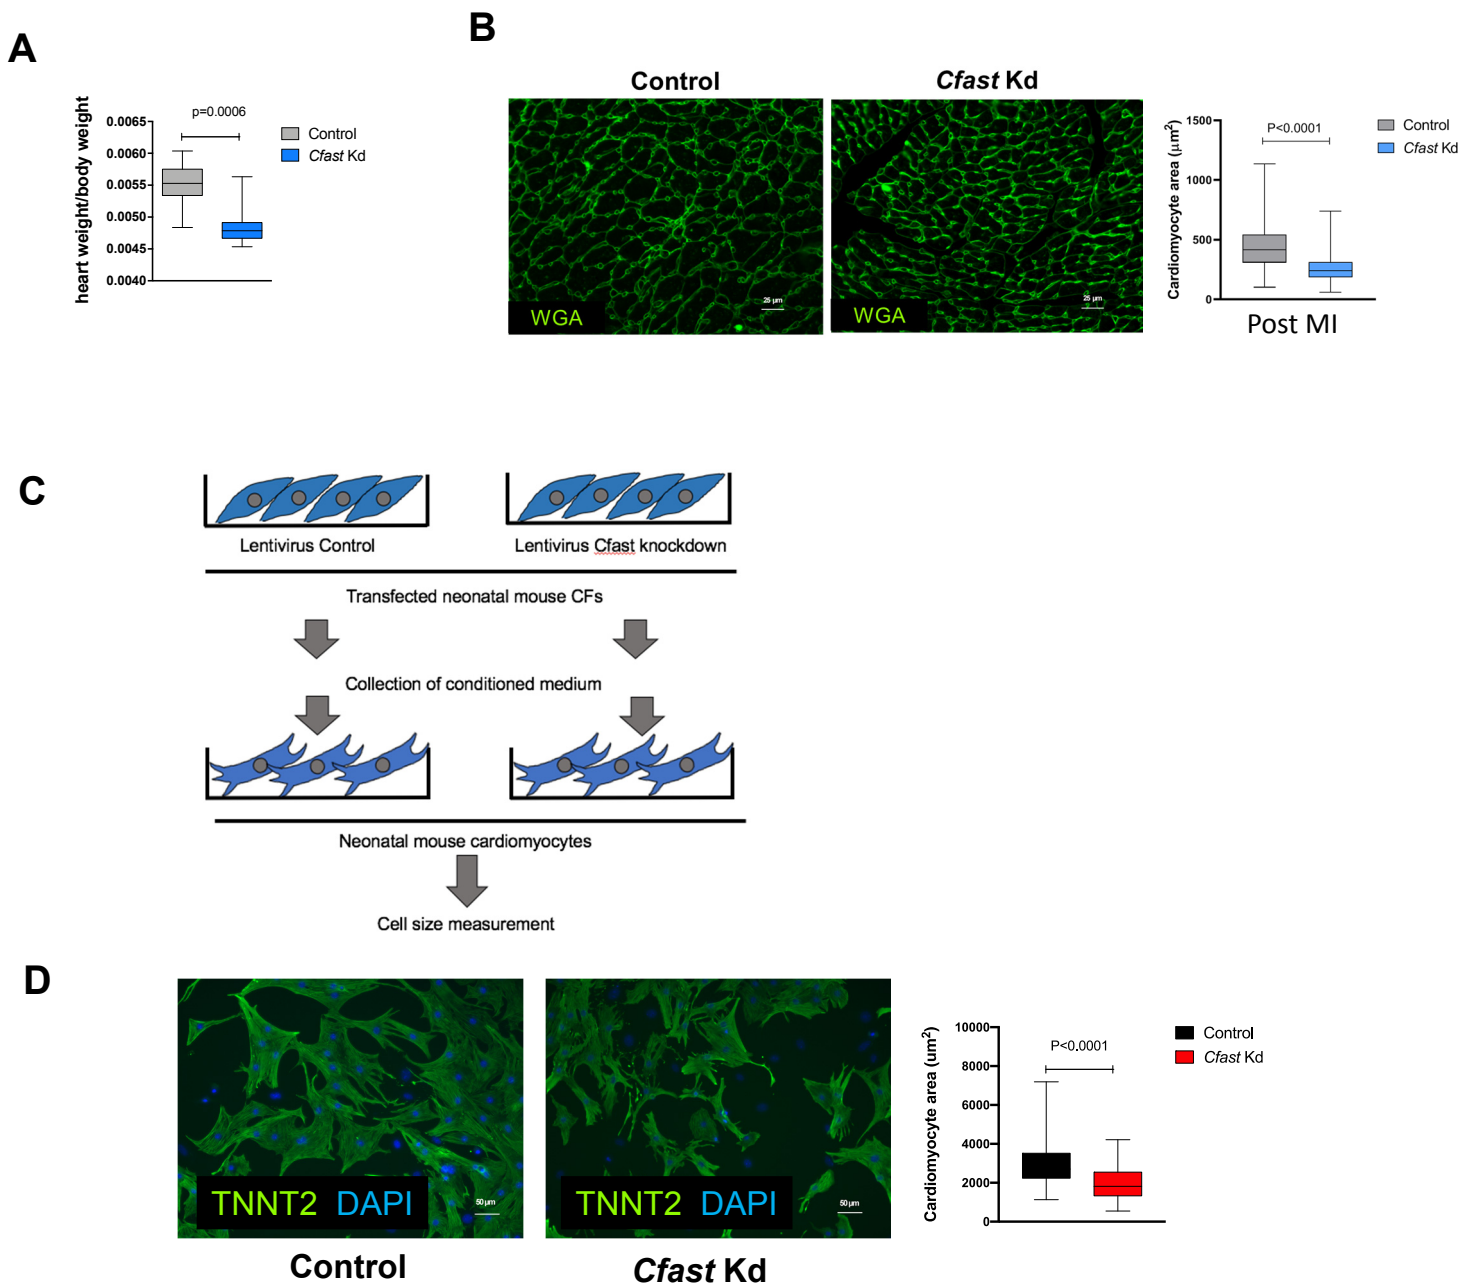

### Supplemental Figure 6 Cfast knocking down reduces cardiomyocyte hypertrophy post MI.

(A) Heart weight to body weight ratio of mouse hearts 28 days after cardiac-injection of Cfast depletion lentivirus and MI (Control  $n=8$ , Cfast Kd  $n=10$ ). P value was determined by Student's t test.

(B) Determination of cardiomyocyte cross-sectional area in histological sections stained with wheat germ agglutinin (WGA, green) from control and Cfast Kd groups post-MI (scale bar= $25\ \mu\text{m}$ ,  $n=6/6$ ). P value was determined by Student's t test.

(C) Neonatal cardiac fibroblasts (CFs) have been transfected with lentivirus control or lentivirus Cfast knockdown. The conditioned medium was collected 48 hours after transfection and added to cultured neonatal mouse cardiomyocytes (NMCMs). Cell sizes were measured 48 hours after addition of CF-conditioned medium.

(D) NMCMs cultured in CFs conditioned medium for 48 hours were then stained with TNNT2 (Green) for cardiomyocytes and DAPI (blue) for nuclear. Cell size measurement in NMCMs ( $n=4$  independent replicates, 127-127 cells each, scale bar= $50\ \mu\text{m}$ ). P value was determined by Student's t test.

## Supplemental Figure 7.

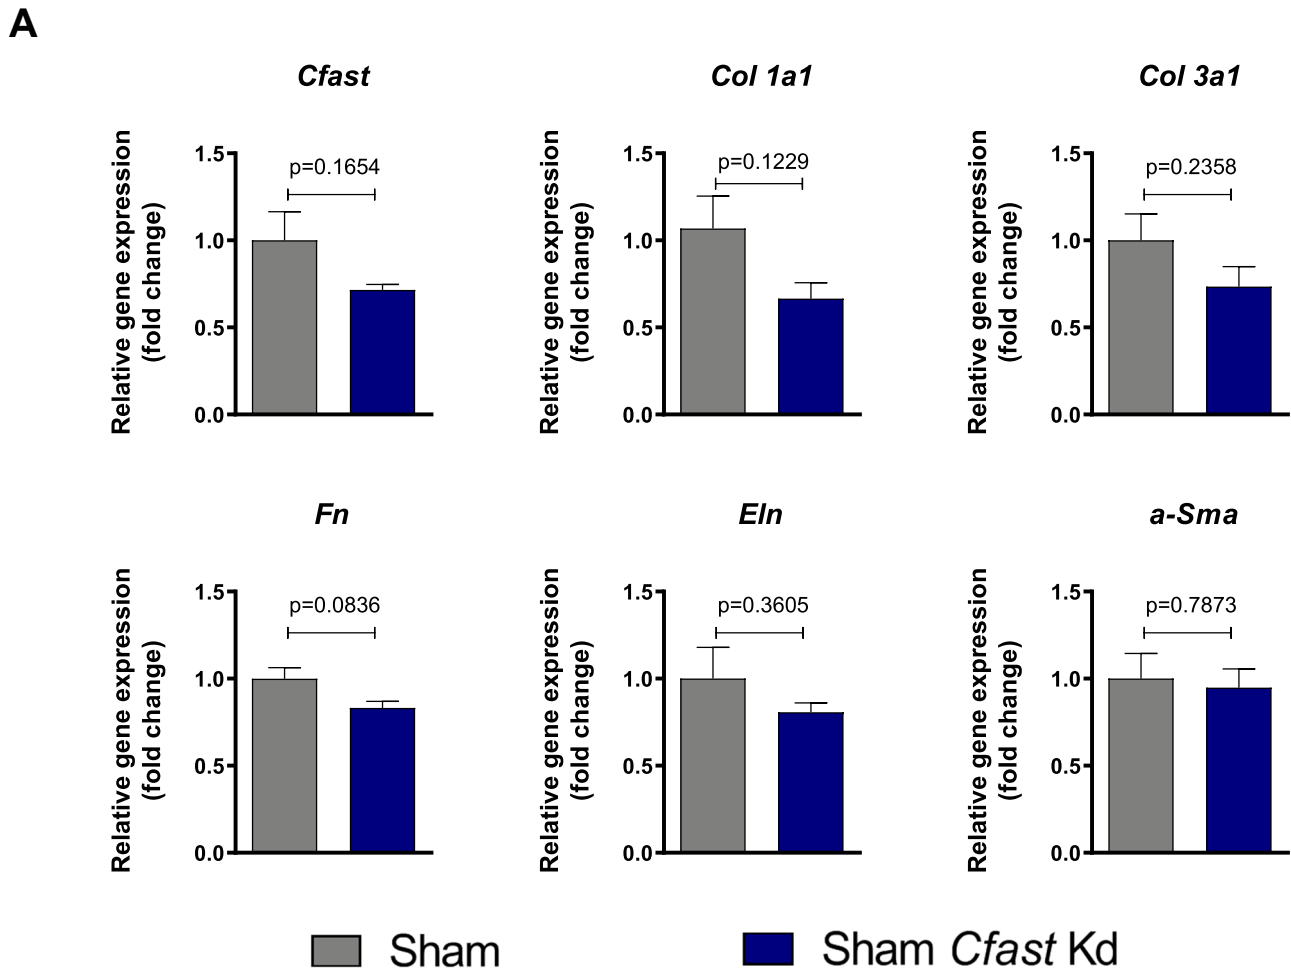

### Supplemental Figure 7 Knock-down of *Cfast* does not affect fibrotic gene in Sham.

(A) qRT-PCR of *Cfast* and fibrosis genes in *Cfast* depletion and control treated with sham. n=3, P values were determined by Student's t test..



## Supplemental Figure 8.

**A**

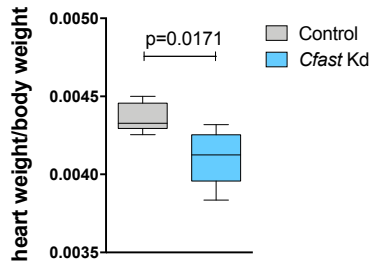

**B**

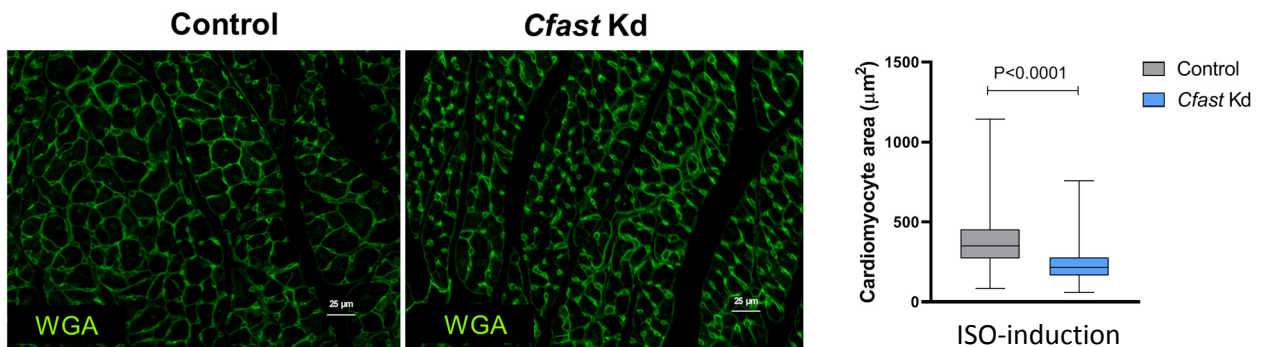

### Supplemental Figure 8. Cfast knocking down reduces cardiac hypertrophy post ISO treatment.

- (A) Heart weight to body weight ratio of mouse hearts 21 days after cardiac injection of Cfast depletion lentivirus and ISO-infusion. Bars represent means normalized to Control  $\pm$  SEM (n=6). P value was determined by Student's t test.
- (B) Determination of cardiomyocyte cross-sectional area in histological sections stained with wheat germ agglutinin (WGA, green) from control and Cfast Kd groups post-ISO treatment (scale bar=25  $\mu\text{m}$ , n=6/6). P value was determined by Student's t test.

# Supplemental Figure 9.

**A**

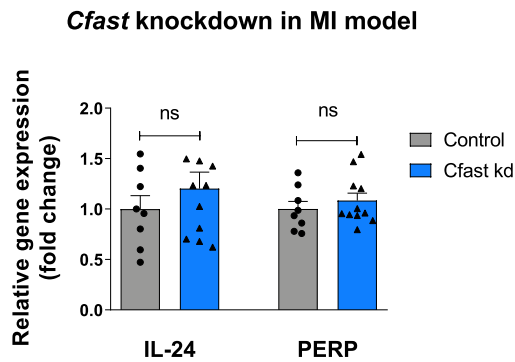

**B**

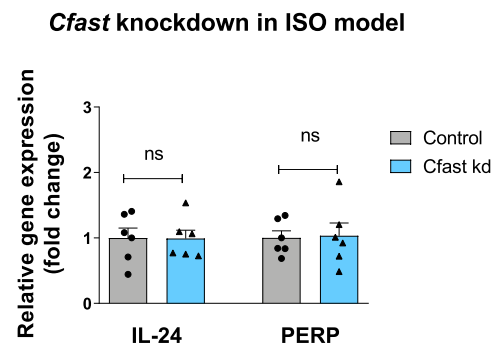

**C**

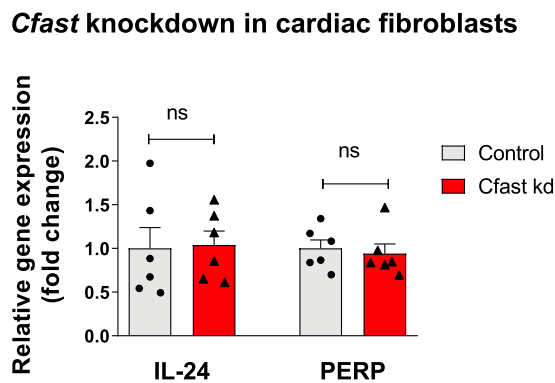

**Supplemental Figure 9. Impact of *Cfast* knocking down in non-canonical TGF-beta signaling.**  
**(A-C) Level of IL-24 and PERP were determined by qRT-PCR on the samples of *Cfast* knocking down and control groups in both in vivo model of (A) myocardial infarction (MI) and (B) isoproterenol (ISO) treated hearts, as well as (C) in vitro model of isolated cardiac fibroblasts. n=6, P values were determined by Student's t test..**

## List of Supplemental Tables

**Supplemental Table 1.** Echocardiography examination of cardiac function after *Cfast*-depletion and 4-week of myocardial infraction or Sham.

**Supplemental Table 2.** Echocardiography examination of cardiac function after *Cfast*-depletion and 3-week of isoproterenol injection.

**Supplemental Table 3.** Primers used for qRT-PCR .

**Supplemental Table 4.** Primers used for RACE.

**Supplemental Table 5.** Sequences for shRNAs and siRNAs

**Supplemental Table 6.** List of the antibodies used in immunofluorescence (IF), western blot (WB), RNA immunoprecipitation (RIP) and immunoprecipitation (IP).

## Supplemental Table 1. Echocardiography examination of cardiac function after Cfast-depletion and 4-week of myocardial infraction or Sham

| Echocardiography examination of cardiac function after Cfast-depletion and 4-week of myocardial infraction (MI) |          |          |          |          |          |          |          |           |            |            |                     |           |           |
|-----------------------------------------------------------------------------------------------------------------|----------|----------|----------|----------|----------|----------|----------|-----------|------------|------------|---------------------|-----------|-----------|
| Group                                                                                                           | Ear tag  | IVS;d    | IVS;s    | LVID;d   | LVID;s   | LVPW;d   | LVPW;s   | EF        | FS         | LV Mass    | LV Mass (Corrected) | LV Vol;d  | LV Vol;s  |
| Control + MI                                                                                                    | 5161     | 1.04386  | 1.528509 | 3.72807  | 2.736404 | 0.902193 | 1.357018 | 52.820535 | 26.599983  | 137.803582 | 110.242866          | 59.187023 | 27.924121 |
|                                                                                                                 | 5163     | 0.939474 | 1.289912 | 4.592982 | 3.862281 | 0.514474 | 0.589035 | 33.598601 | 15.909076  | 130.800512 | 104.64041           | 96.988415 | 64.401664 |
|                                                                                                                 | 5164     | 1.08114  | 1.543421 | 4.108333 | 3.131579 | 0.477193 | 0.917105 | 47.890866 | 23.774947  | 118.589714 | 94.871771           | 74.580482 | 38.863243 |
|                                                                                                                 | 5166     | 0.939474 | 1.014035 | 4.637719 | 3.892105 | 0.260965 | 0.969298 | 33.888607 | 16.077171  | 104.497831 | 83.598265           | 99.215474 | 65.592732 |
|                                                                                                                 | 5180     | 1.0625   | 1.706439 | 4.475379 | 3.953788 | 0.347727 | 0.341288 | 25.386983 | 11.654678  | 120.296885 | 96.237508           | 91.262184 | 68.093469 |
|                                                                                                                 | 3534     | 0.820175 | 0.857456 | 3.646053 | 2.870614 | 0.730702 | 0.872368 | 44.015705 | 21.267903  | 96.759712  | 77.40777            | 56.117074 | 31.416748 |
|                                                                                                                 | 3535     | 0.924561 | 1.237719 | 4.190351 | 3.288158 | 0.924561 | 1.282456 | 44.018605 | 21.530249  | 154.488415 | 123.590732          | 78.152109 | 43.750641 |
| 3540                                                                                                            | 0.820175 | 1.230263 | 4.369298 | 3.467105 | 0.551754 | 0.842544 | 42.3518  | 20.648466 | 111.436135 | 89.148908  | 86.256018           | 49.725042 |           |
| Cfast kd + MI                                                                                                   | 5169     | 1.006579 | 1.550877 | 3.578947 | 2.244298 | 0.782895 | 1.461404 | 68.25463  | 37.291667  | 114.64575  | 91.7166             | 53.670932 | 17.038036 |
|                                                                                                                 | 5170     | 0.984211 | 1.476316 | 3.854825 | 2.736404 | 0.663596 | 0.932018 | 56.440525 | 29.013535  | 115.127142 | 92.101714           | 64.105734 | 27.924121 |
|                                                                                                                 | 5171     | 1.014035 | 1.640351 | 3.549123 | 2.341228 | 0.685965 | 1.357018 | 63.98113  | 34.033619  | 105.220914 | 84.176731           | 52.602725 | 18.946907 |
|                                                                                                                 | 5175     | 1.02     | 1.4875   | 4.030417 | 2.734167 | 0.6375   | 1.1475   | 60.898419 | 32.161685  | 124.829589 | 99.863671           | 71.270343 | 27.867831 |
|                                                                                                                 | 5177     | 0.94693  | 1.431579 | 4.160526 | 2.669298 | 0.775439 | 1.498684 | 65.822735 | 35.842295  | 138.552993 | 110.842394          | 76.842963 | 26.262823 |
|                                                                                                                 | 5178     | 0.984211 | 1.342105 | 3.832456 | 2.684211 | 0.827632 | 1.222807 | 57.883326 | 29.961075  | 130.073582 | 104.058866          | 63.222309 | 26.627134 |
|                                                                                                                 | 3537     | 0.529386 | 1.036404 | 3.899561 | 2.400877 | 0.715789 | 1.088596 | 69.376679 | 38.432121  | 80.947784  | 64.758227           | 65.892337 | 20.178422 |
|                                                                                                                 | 3538     | 0.669697 | 0.95303  | 3.889394 | 2.826894 | 0.721212 | 1.101136 | 53.799374 | 27.31788   | 93.071439  | 74.457151           | 65.483979 | 30.254008 |
|                                                                                                                 | 3539     | 0.812719 | 1.334649 | 4.15307  | 2.840789 | 0.61886  | 0.976754 | 59.981823 | 31.597854  | 107.978434 | 86.382747           | 76.517538 | 30.620924 |
|                                                                                                                 | 3533     | 0.909649 | 1.461404 | 3.899561 | 2.848246 | 1.021491 | 1.215351 | 53.228485 | 26.95983   | 146.290977 | 117.032782          | 65.892337 | 30.818844 |

| Echocardiography examination of cardiac function after Cfast-depletion and 4-week of Sham |         |            |            |             |             |             |             |           |           |              |                          |               |               |
|-------------------------------------------------------------------------------------------|---------|------------|------------|-------------|-------------|-------------|-------------|-----------|-----------|--------------|--------------------------|---------------|---------------|
| Group                                                                                     | Ear tag | IVS;d (mm) | IVS;s (mm) | LVID;d (mm) | LVID;s (mm) | LVPW;d (mm) | LVPW;s (mm) | EF (%)    | FS (%)    | LV Mass (mg) | LV Mass (Corrected) (mg) | LV Vol;d (ul) | LV Vol;s (ul) |
| Control + Sham                                                                            | 9208    | 1.040517   | 1.626724   | 3.326724    | 1.67069     | 0.791379    | 0.981897    | 82.181321 | 49.779723 | 105.785152   | 84.628122                | 45.003066     | 8.018952      |
|                                                                                           | 9204    | 0.893966   | 1.450862   | 2.740517    | 1.231034    | 1.011207    | 1.289655    | 87.168154 | 55.080228 | 83.906025    | 67.12482                 | 28.027783     | 3.596482      |
|                                                                                           | 9205    | 0.981897   | 1.201724   | 2.637931    | 1.157759    | 1.128448    | 1.568103    | 88.028739 | 56.111096 | 93.399738    | 74.71979                 | 25.505634     | 3.053346      |
| Cfast kd + Sham                                                                           | 9203    | 0.718103   | 1.143103   | 2.637931    | 1.24569     | 0.87931     | 1.406897    | 85.448352 | 52.777764 | 60.671408    | 48.537126                | 25.505634     | 3.71149       |
|                                                                                           | 9206    | 0.85       | 1.289655   | 2.989655    | 1.480172    | 0.967241    | 1.289655    | 83.142882 | 50.490207 | 88.818117    | 71.054494                | 34.705659     | 5.850374      |
|                                                                                           | 9207    | 0.674138   | 0.835345   | 2.799138    | 1.406897    | 0.703448    | 1.157759    | 82.658998 | 49.738205 | 53.630676    | 42.904541                | 29.52838      | 5.120517      |

## Supplemental Table 2 Echocardiography examination of cardiac function after Cfast-depletion and 3-week of isoproterenol injection

| Echocardiography examination of cardiac function after Cfast-depletion and 3-week of isoproterenol (ISO) injection |         |          |          |          |          |          |          |           |           |           |                      |           |           |
|--------------------------------------------------------------------------------------------------------------------|---------|----------|----------|----------|----------|----------|----------|-----------|-----------|-----------|----------------------|-----------|-----------|
| Group                                                                                                              | Ear tag | IVS;d    | IVS;s    | LVID;d   | LVID;s   | LVPW;d   | LVPW;s   | EF        | FS        | LV Mass   | LV Mass (Corrected ) | LV Vol;d  | LV Vol;s  |
| Control + ISO                                                                                                      | 8602    | 0.676136 | 0.6375   | 3.750247 | 2.938043 | 0.813043 | 0.794565 | 44.600568 | 21.657347 | 95.913296 | 76.730637            | 60.032316 | 33.257562 |
|                                                                                                                    | 8603    | 0.760128 | 0.913834 | 3.303409 | 2.272826 | 0.804644 | 0.869318 | 60.247318 | 31.19756  | 83.527583 | 66.822066            | 44.243611 | 17.588022 |
|                                                                                                                    | 8610    | 0.63666  | 0.720652 | 2.842292 | 1.977174 | 0.760968 | 0.794565 | 59.685993 | 30.437337 | 56.081623 | 44.865298            | 30.66076  | 12.360581 |
|                                                                                                                    | 8611    | 0.734091 | 0.865119 | 3.492391 | 2.328261 | 0.714773 | 0.74417  | 63.075338 | 33.333324 | 82.186345 | 65.749076            | 50.60286  | 18.684935 |
|                                                                                                                    | 8612    | 0.714773 | 0.714773 | 3.148864 | 2.376136 | 0.579545 | 0.656818 | 50.079425 | 24.539898 | 59.488849 | 47.591079            | 39.387251 | 19.662342 |
| Cfast kd + ISO                                                                                                     | 8527    | 0.772727 | 0.734091 | 3.651136 | 2.743182 | 0.734091 | 0.540909 | 50.101803 | 24.867712 | 93.245457 | 74.596366            | 56.304766 | 28.095063 |
|                                                                                                                    | 8601    | 0.693775 | 0.826482 | 3.048913 | 1.962055 | 0.560227 | 0.626581 | 66.709742 | 35.647393 | 54.046809 | 43.237447            | 36.410217 | 12.121055 |
|                                                                                                                    | 8606    | 0.699654 | 0.824382 | 3.687253 | 2.450469 | 0.519071 | 0.882337 | 63.163663 | 33.542152 | 71.550127 | 57.240102            | 57.648167 | 21.235473 |
|                                                                                                                    | 8608    | 0.52957  | 0.810524 | 3.267712 | 1.794911 | 0.594664 | 0.713093 | 77.608537 | 45.071322 | 52.465347 | 41.972278            | 43.094474 | 9.649483  |
|                                                                                                                    | 8614    | 0.628261 | 0.729891 | 3.464674 | 2.217391 | 0.628261 | 0.74837  | 66.704392 | 36.00001  | 67.017316 | 53.613853            | 49.641088 | 16.528302 |
|                                                                                                                    | 8530    | 0.560227 | 1.120455 | 3.825    | 2.298864 | 0.560227 | 0.85     | 71.239793 | 39.89898  | 68.435919 | 54.748735            | 62.929315 | 18.098601 |
|                                                                                                                    | 8531    | 0.683696 | 0.572826 | 3.326087 | 2.051087 | 0.628261 | 0.73913  | 69.832225 | 38.333333 | 66.312722 | 53.050178            | 44.982223 | 13.570136 |

### Supplemental Table 3. Primers used for qRT-PCR

| Supplemental Table 3. Primers used for qRT-PCR |                |                            |                          |
|------------------------------------------------|----------------|----------------------------|--------------------------|
| Species                                        | lncRNA         | Forward primer sequences   | Reverse primer sequences |
| Mouse                                          | NR-102296      | GCGGGAGTAACAAGGACACA       | AAAACGGAGCCTGACACCAT     |
| Mouse                                          | NC-000072      | CACTTTGCTATGGCAGGCTC       | AGGCAGATGAAGCAAGGTCC     |
| Mouse                                          | NR-038009      | GCTGCGGCAGTTTGTACTC        | TAGCAGATGCTTGGGTGAGC     |
| Mouse                                          | NR-015519      | TCTGCAAACTACCTCTGCCG       | CCGAAAACCAGGACCAGTCA     |
| Mouse                                          | NR-033498      | AGCCCCACATAAGGAACTGC       | ACTGCCACTGCACTCTCATC     |
| Mouse                                          | NR-024720      | TCACAGCCGAAATCAAAGCAC      | TTCACCAAGAAGCATTGCGTTC   |
| Mouse                                          | NC-000071      | GGCCTTTTGCTTAGCACTGG       | GCTTTGTAAGGCCACGGTTC     |
| Mouse                                          | lncRNA-Cfast   | TCCTGGGTTTGGTAACTGCC       | GAATTCTGCTGGCCTGAGGT     |
| Human                                          | n338538        | AAAATAAACTCTTTGGCTCAGTTTGT | GATCTCCTCGGGGCTCAG       |
| Human                                          | n384785        | CAGCTTCTTCTGCATCTGAGG      | TGCGGTTAGAAACTCAGCTAGAA  |
| Human                                          | lncRNA-Cfast-1 | AGACAGGGGCATTGCCTTTA       | CAAGGCTCCCCAGCAGATAA     |
| Human                                          | lncRNA-Cfast-2 | TCTTTCCCGATCCAATGTGCT      | GTCAATGGCTCCATCTGGCT     |
| Species                                        | mRNA           | Forward primer sequences   | Reverse primer sequences |
| Mouse                                          | Nppa           | CACAGATCTGATGGATTCAAGA     | CCTCATCTTCTACCGGCATC     |
| Mouse                                          | Nppb           | GTCAGTCGTTTGGGCTGTAAC      | AGACCCAGGCAGAGTCAGAA     |
| Mouse                                          | Myh7           | CGCATCAAGGAGCTCACC         | CTGCAGCCGCAGTAGGTT       |
| Mouse                                          | Col1a1         | CATGTTCACTTTGTGGACCT       | GCAGCTGACTTCAGGGATGT     |
| Mouse                                          | Col3a1         | TCCCCTGGAATCTGTGAATC       | TGAGTCGAATTGGGGAGAAT     |
| Mouse                                          | Fn1            | CCTTCTGTGGCTCCAGA T        | GCTGCCCCCATTCATAACA      |
| Mouse                                          | Ein            | TGGAGCAGGACTTGGAGGT        | CCTCCAGCACCATACTTAGCA    |
| Mouse                                          | $\alpha$ -Sma  | CCAGCACCATGAAGATCAAG       | TCCACATCTGCTGGAAGGTA     |
| Mouse                                          | Cotl1          | ACCGACAAGACGCTGGTG         | GCTGATCACAAATTCCTTTGC    |
| Mouse                                          | Myh6           | GGGCTGGAGCACTGAGAG         | GAGAGAGGAACAGGCAGGAA     |
| Mouse                                          | Gapdh          | TGCACCACCAACTGCTTAGC       | GGCATGGACTGTGGTCATGAG    |
| Mouse                                          | 18S RNA        | TCCGACCATAAACGATGCCG       | CAATCTGTCAATCCTGTCCGTGTC |
| Mouse                                          | Neat1          | TGGCCCCTTTTGTTCATTAGC      | TGGAAGGCCATTGTTTCAGG     |
| Mouse                                          | Xist           | GGAAAGCCCCAAGTAAAAGG       | CCAGGAACCAATTCTTGCCCTA   |
| Mouse                                          | Postn          | AAGCTGCGGCAAGACAAG         | TCAAATCTGCAGCTTCAAGG     |
| Human                                          | Nppa           | CAGGATGGACAGGATTGGA        | TGTCCTCCCTGGCTGTTATC     |
| Human                                          | Nppb           | GATGGTGCAAGGGTCTGG         | TAATGCCGCCTCAGCACT       |
| Human                                          | $\beta$ -actin | CCAACCGCGAGAAGATGA         | CCAGAGGCCGTACAGGGATAG    |

## Supplemental Table 4. Primers used for RACE

| Supplemental Table 4. Primers used for RACE |                                  |
|---------------------------------------------|----------------------------------|
| Primer name                                 | Primer sequence                  |
| 5' RACE-GSP-Cfast                           | CTGGAAGAGAACACCCTGCTCCC          |
| 5' RACE-GSP2-Cfast                          | GGGAGCAGGGTGTTCTCTTC             |
| 3' RACE-GSP-Cfast                           | GAAACCAGACCATCAGGAGGTAGC         |
| 3' RACE-GSP2-Cfast                          | GCTACCTCCTGATGGTCTGG             |
| Cfast full sequence primer F                | CCCATGTA CTCTGCGTGGATACC         |
| Cfast full sequence primer R                | ATGTCGTATACATACATTTATTGCATGGCTCC |

## Supplemental Table 5. Sequences for shRNAs and siRNAs

| <b>Sequences for shRNAs</b> |                              |                             |
|-----------------------------|------------------------------|-----------------------------|
| <b>Name</b>                 | <b>Sense (5'-3')</b>         | <b>Antisense (5'-3')</b>    |
| Control shRNA               | GTACGTCGTGAACCCCTTGAAGATTAGT | ACTAATCTTCAAGGGTTCACGACGTAC |
| Cfast shRNA                 | GTCTGAATGTATCAATGGGCCTAGTCA  | TGACTAGGCCCATGATACATTCAGAC  |
| <b>Sequences for siRNAs</b> |                              |                             |
| <b>Name</b>                 | <b>Sense (5'-3')</b>         | <b>Antisense (5'-3')</b>    |
| Cfast siRNA-1               | CCAACAACUUCAUUCACAUTT        | AUGUGAAUGAAGUUGUUGGTT       |
| Cfast siRNA-2               | CCUGCAUUUGUAUGGCUAATT        | UUAGCCAUACAAAUGCAGGTT       |



**Supplemental Table 6.** List of the antibodies used in immunofluorescence (IF), western blot (WB), RNA immunoprecipitation (RIP) and Immunoprecipitation (IP)

| <b>List of the antibodies used in immunofluorescence (IF), western blot (WB), RNA immunoprecipitation (RIP) and Immunoprecipitation (IP)</b> |                                      |                  |               |                     |
|----------------------------------------------------------------------------------------------------------------------------------------------|--------------------------------------|------------------|---------------|---------------------|
| <b>Primary antibodies</b>                                                                                                                    | <b>Source</b>                        | <b>Catalog #</b> | <b>Origin</b> | <b>Application</b>  |
| COL3A1                                                                                                                                       | Abclonal                             | A3795            | Rabbit        | 1:1000for WB        |
| Collagen I                                                                                                                                   | Bioss                                | bs10423R         | Rabbit        | 1:1000for WB        |
| $\beta$ -ACTIN                                                                                                                               | CST                                  | 4970s            | Rabbit        | 1:2000for WB        |
| COTL1                                                                                                                                        | Abcam                                | ab235833         | Rabbit        | 1:1000for WB        |
| TGF $\beta$ RAP1                                                                                                                             | Abclonal                             | A14386           | Rabbit        | 1:1000for WB        |
|                                                                                                                                              |                                      |                  |               |                     |
| phospho-Histone H3                                                                                                                           | Millipore                            | 06-570           | Rabbit        | 1:400 for IF        |
| $\alpha$ -Smooth Muscle Actin-FITC                                                                                                           | SIGMA                                | F3777            | Mouse         | 1:400 for IF        |
| myosin, sarcomere (MHC)                                                                                                                      | Developmental Studies Hybridoma Bank | MF20             | Mouse         | 5 $\mu$ g/ml for IF |
|                                                                                                                                              |                                      |                  |               |                     |
| Monoclonal ANTI-FLAG                                                                                                                         | SIGMA                                | F1804            | Mouse         | RIP and IP          |
| IgG1 Isotype Control                                                                                                                         | Invitrogen                           | MA5-14453        | Mouse         | RIP and IP          |
|                                                                                                                                              |                                      |                  |               |                     |
| <b>Secondary antibodies</b>                                                                                                                  |                                      |                  |               |                     |
| Alexa Fluor® 594 Goat Anti-Rabbit                                                                                                            | Invitrogen                           | A-11012          | Goat          | 1:400 for IF        |
| Alexa Fluor® 488 Goat Anti-Mouse                                                                                                             | Invitrogen                           | A-11001          | Goat          | 1:400 for IF        |
| Alexa Fluor™ 594 Conjugate, Wheat Germ Agglutinin (WGA)                                                                                      | Invitrogen                           | W11262           |               | 1:400 for IF        |
| Goat anti-mouse IgG HRP                                                                                                                      | Hangzhou Huaan Biotechnology         | HA1006           | Goat          | 1:2000for WB        |
| Goat anti-rabbit IgG HRP                                                                                                                     | Hangzhou Huaan Biotechnology         | HA1001           | Goat          | 1:2000for WB        |
